# Supplementary material
Source: publisher figshare collection journal article supplement (https://gsapubs.figshare.com/articles/dataset/_/25395667)
Supplement: Supplementary file 1 [file 1]

## Sheet: Major elements
Table S1 EMPA results for titania grains from the Hailijin ore field
Hosted rock	Sample No.	SiO2	UO2	ZrO2	TiO2	P2O5	WO3	V2O3	FeO	Nb2O5	Total
The lower Yaojia Formation	Titania-2-1	0.111	b.d.l	0.176	94.919	0.039	b.d.l	1.016	0.1	0.286	96.656
	Titania-2-2	0.095	b.d.l	0.039	97.897	b.d.l	b.d.l	b.d.l	0.338	0.228	98.642
	Titania-2-3	0.273	0.206	0.26	93.199	0.134	b.d.l	0.169	0.326	0.14	94.725
	Titania-2-4	b.d.l	b.d.l	0.062	98.578	b.d.l	0.235	b.d.l	0.197	0.094	99.276
	Titania-2-5	b.d.l	b.d.l	0.035	97.746	b.d.l	b.d.l	b.d.l	0.566	0.624	99.013
	Titania-2-6	b.d.l	0.02	0.06	98.61	b.d.l	b.d.l	0.165	0.152	0.145	99.175
	Titania-2-7	0.177	0.179	0.371	92.244	0.202	b.d.l	0.136	1.119	0.222	94.686
	Titania-2-8	b.d.l	b.d.l	0.035	98.213	b.d.l	b.d.l	b.d.l	0.169	0.236	98.774
	Titania-2-9	b.d.l	b.d.l	0.078	97.605	b.d.l	b.d.l	0.763	0.095	0.27	98.813
	Titania-2-10	b.d.l	b.d.l	0.081	97.86	b.d.l	b.d.l	0.817	0.171	0.231	99.216
	Titania-2-11	0.052	0.01	b.d.l	97.734	b.d.l	b.d.l	0.202	0.319	0.544	98.866
	Titania-2-12	0.098	0.166	0.351	91.636	0.227	0.146	0.375	1.004	0.138	94.141
	Titania-2-13	b.d.l	b.d.l	0.034	97.73	b.d.l	0.122	0.355	1.175	0.094	99.51
	Titania-2-14	b.d.l	b.d.l	0.212	98.111	b.d.l	b.d.l	b.d.l	0.116	0.051	98.608
	Titania-2-15	b.d.l	b.d.l	0.267	97.667	b.d.l	b.d.l	0.727	0.161	0.136	99.027
	Titania-2-16	0.158	b.d.l	0.038	94.912	b.d.l	b.d.l	b.d.l	0.923	1.54	97.698
	Titania-2-17	b.d.l	b.d.l	0.067	98.008	b.d.l	b.d.l	0.404	0.524	0.082	99.086
	Titania-2-18	b.d.l	b.d.l	b.d.l	96.936	b.d.l	0.154	0.792	0.258	0.916	99.08
	Titania-2-19	b.d.l	b.d.l	b.d.l	97.67	b.d.l	0.143	0.355	0.802	0.187	99.17
	Titania-2-20	0.143	0.096	0.514	91.281	0.265	b.d.l	0.424	1.204	0.153	94.08
	Titania-2-21	b.d.l	b.d.l	0.053	93.748	b.d.l	b.d.l	1.677	0.653	2.812	98.954
	Titania-2-22	b.d.l	0.01	0.031	98.318	b.d.l	b.d.l	0.144	0.555	b.d.l	99.148
	Titania-2-23	b.d.l	b.d.l	b.d.l	97.344	b.d.l	b.d.l	b.d.l	0.561	0.608	98.596
	Titania-2-24	0.145	0.334	0.386	91.94	0.183	b.d.l	b.d.l	0.914	0.143	94.115
	Titania-2-25	b.d.l	b.d.l	0.082	98.118	b.d.l	b.d.l	0.306	0.442	0.092	99.04
	Titania-2-26	b.d.l	b.d.l	b.d.l	95.899	b.d.l	0.154	b.d.l	0.619	1.457	98.165
	Titania-2-27	b.d.l	b.d.l	b.d.l	98.455	b.d.l	b.d.l	b.d.l	0.093	0.167	98.847
	Titania-2-28	b.d.l	b.d.l	0.066	98.711	b.d.l	b.d.l	0.326	0.116	0.22	99.489
	Titania-2-29	b.d.l	b.d.l	0.053	98.439	b.d.l	b.d.l	0.339	0.171	0.134	99.185
	Titania-2-30	0.15	0.051	0.083	94.742	0.097	0.125	1.117	1.08	0.302	97.747
	Titania-2-31	b.d.l	b.d.l	0.099	95.021	b.d.l	0.157	2.98	0.155	1.28	99.71
	Titania-2-32	0.162	0.28	0.325	92.563	0.161	0.154	0.239	0.992	0.157	95.033
The upper Yaojia Formation	Titania-3-1	0.217	b.d.l	0.101	96.625	b.d.l	0.41	b.d.l	0.592	0.478	98.485
	Titania-3-2	b.d.l	b.d.l	0.043	98.142	b.d.l	b.d.l	b.d.l	0.181	0.078	98.584
	Titania-3-3	b.d.l	b.d.l	0.166	97.619	b.d.l	b.d.l	b.d.l	0.58	0.262	98.708
	Titania-3-4	b.d.l	b.d.l	b.d.l	96.305	0.012	0.41	0.14	0.857	0.7	98.477
	Titania-3-5	0.433	b.d.l	b.d.l	96.032	b.d.l	0.362	b.d.l	0.807	0.126	97.76
	Titania-3-6	b.d.l	0.013	0.043	97.146	b.d.l	0.3	b.d.l	0.732	0.751	99.032
	Titania-3-7	b.d.l	b.d.l	0.218	94.152	b.d.l	0.258	0.156	1.153	2.936	98.909
	Titania-3-8	b.d.l	b.d.l	b.d.l	98.145	0.012	b.d.l	0.64	0.241	0.3	99.392
	Titania-3-9	b.d.l	b.d.l	0.179	97.665	b.d.l	b.d.l	b.d.l	0.212	b.d.l	98.202
	Titania-3-10	0.201	b.d.l	0.168	95.915	0.028	b.d.l	b.d.l	0.893	0.511	97.891
	Titania-3-11	0.927	0.02	0.243	95.623	0.013	b.d.l	b.d.l	0.357	0.427	97.641
	Titania-3-12	0.543	b.d.l	0.154	96.675	b.d.l	b.d.l	b.d.l	0.189	0.085	97.757
	Titania-3-13	b.d.l	b.d.l	0.296	97.402	b.d.l	b.d.l	0.532	0.185	0.592	99.026
	Titania-3-14	b.d.l	b.d.l	b.d.l	95.083	b.d.l	0.104	b.d.l	0.793	2.731	98.759
	Titania-3-15	0.762	b.d.l	0.292	91.936	0.092	b.d.l	0.305	1.361	0.35	95.098
	Titania-3-16	0.064	0.018	0.069	97.257	b.d.l	0.187	b.d.l	0.184	0.279	98.148
	Titania-3-17	0.088	b.d.l	0.166	92.531	b.d.l	3.185	b.d.l	2.156	0.309	98.439
	Titania-3-18	0.562	0.012	0.109	93.154	0.019	0.229	b.d.l	1.191	1.19	96.536
	Titania-3-19	b.d.l	b.d.l	b.d.l	97.456	b.d.l	0.223	0.297	0.37	0.215	98.576
	Titania-3-20	b.d.l	b.d.l	0.106	97.28	b.d.l	0.252	b.d.l	0.278	0.291	98.243
	Titania-3-21	0.113	b.d.l	0.034	98.619	b.d.l	0.119	b.d.l	0.043	0.134	99.124
	Titania-3-22	0.37	b.d.l	0.109	96.617	b.d.l	b.d.l	0.161	0.666	0.203	98.134
	Titania-3-23	b.d.l	b.d.l	0.219	97.667	b.d.l	b.d.l	0.26	0.415	0.329	98.903
	Titania-3-24	b.d.l	b.d.l	0.035	97.606	b.d.l	b.d.l	0.471	0.187	0.221	98.544
Detection limit		0.0424286	0.00918908	0.0293308	0.0196667	0.0114516	0.0895217	0.130147	0.0264857	0.0317484
Note that EMPA results for titania grains from the upper Yaojia Formation is from Yan et al. (2023)

## Sheet: Trace elements
Table S2 Trace elements contents in titania from the Hailijin ore field
Hosted rock	Sample No.	Texture	Polymorphs	Mg	Al	Si	Ca	Sc	V	Cr	Mn	Fe	Co	Ni	Cu	Zn	Ga	Ge	Y	Zr	Nb	Mo	Sn	Sb	Hf	Ta	W	Pb	Th	U
The lower Yaojia Formation	Titania-2-01	Porous	Rutile	196.492	1116.76	2527.58	215.066	9.24314	3150.34	1728.74	11.4329	1496.15	0.234177	1.22964	2.73152	12.6988	3.19708	4.91351	13.309	1587.53	2557.5	7.8443	349.556	10.7012	54.5482	342.184	619.752	25.9044	127.523	75.4342
	SD			13.2988	88.1427	159.909	14.5939	0.451006	125.899	68.5998	0.56134	81.9224	0.0269556	0.169366	0.292217	1.24149	0.184152	0.191415	0.551093	54.6466	89.7129	0.392951	10.3882	0.358069	2.01765	12.8035	22.1639	0.775398	4.19465	3.08556
	Titania-2-02	Smooth	Anatase	89.2567	300.234	984.965	157.659	350.64	121.201	b.d.l.	69.2974	2794.23	b.d.l.	b.d.l.	1.24913	5.77427	0.722293	0.626227	14.5288	513.548	1688.06	1.31603	83.3183	3.38818	18.5331	70.01	2250.64	29.2576	0.844303	0.707751
	SD			3.03844	23.4783	42.9778	12.0812	9.4264	4.99151		2.59316	92.5015			0.147069	0.577144	0.0611842	0.108057	0.690549	9.16296	39.3981	0.146243	1.0582	0.262695	0.379612	2.21471	43.5927	1.96038	0.0489993	0.0558595
	Titania-2-03	Porous	Anatase	174.197	3766.44	1448.97	1316.87	6.89088	1770.27	333.207	27.8345	2642.74	0.0523851	b.d.l.	2.28804	18.1447	5.63266	2.65455	18.0169	2657.23	1465.65	68.6149	43.5085	3.17834	38.6426	56.7835	216.466	142.431	19.7116	1552.16
	SD			4.85318	95.317	64.7994	29.0315	0.247245	47.3181	8.72935	0.597459	63.9372	0.0103241		0.224313	0.9081	0.121108	0.111726	0.56246	69.0002	36.642	1.31575	0.812494	0.0924103	1.03711	1.54918	4.68052	2.16402	0.868211	50.6373
	Titania-2-04	Smooth	Anatase	86.9747	89.9094	694.04	b.d.l.	337.747	212.303	62.4742	0.763865	1271.73	b.d.l.	b.d.l.	1.41181	5.63385	0.0867384	b.d.l.	3.38224	395.238	564.734	0.105817	62.4316	0.319615	16.0828	27.8041	15.3959	9.77924	1.00422	4.39656
	SD			3.37559	1.98277	25.8201		9.82493	6.35261	2.42936	0.0985342	47.0136			0.163568	0.661965	0.016733		0.145016	11.4081	21.5246	0.0227135	1.34307	0.0244245	0.491088	0.805515	0.467019	0.56022	0.0506124	0.0943681
	Titania-2-05	Smooth	Anatase	163.34	918.321	2312.91	47.0194	174.783	202.18	15.3923	25.6623	3440.15	b.d.l.	b.d.l.	1.27687	6.45727	0.604441	0.61268	9.21707	385.181	4132.74	0.0327226	85.4005	2.82307	15.7806	398.436	43.8699	1.7795	1.75773	1.41092
	SD			6.86562	94.1957	180.564	7.40015	4.64645	5.00851	0.709811	0.656227	89.2745			0.113112	0.537489	0.0724822	0.0940003	0.245248	10.2355	123.61	0.0136288	0.939569	0.10727	0.393533	10.1335	0.764775	0.0802919	0.0367481	0.102044
	Titania-2-06	Smooth	Anatase	98.8949	194.625	1186.72	144.612	295.971	156.472	25.5499	22.7408	1305.75	b.d.l.	b.d.l.	1.43621	13.5441	0.252142	b.d.l.	18.2539	418.338	978.52	b.d.l.	31.3479	0.871884	22.1889	46.478	127.525	80.5622	0.848614	0.34505
	SD			2.66171	5.82643	38.6747	10.4063	10.8875	6.05883	2.14365	0.823884	38.7918			0.162398	0.938111	0.0247618		0.882215	15.6039	21.7307		1.15649	0.0510659	0.848411	1.47609	2.77575	3.16259	0.0516911	0.017825
	Titania-2-08	Smooth	Anatase	258.095	786.571	2208.86	39.5341	93.4547	94.0034	7.41306	3.29207	1322.85	0.0589666	b.d.l.	1.26505	3.90422	0.259261	b.d.l.	0.359316	264.602	3420.29	b.d.l.	1.3449	0.444646	6.90528	15.116	4201.01	1.19834	1.12452	2.83073
	SD			6.80888	33.4537	84.5367	6.83865	3.80215	3.47043	0.380223	0.140558	26.3154	0.037256		0.228387	0.361206	0.0282395		0.0204274	8.39736	82.6433		0.079709	0.0326949	0.194188	0.362015	56.8066	0.0426616	0.0360818	0.272277
	Titania-2-09	Smooth	Rutile	85.1121	52.7841	582.51	b.d.l.	4.1386	3543.32	1207.74	b.d.l.	1259.56	b.d.l.	b.d.l.	1.23306	3.47161	0.18009	0.526981	0.0763624	638.086	2300.23	28.519	16.1141	0.0740434	36.2281	118.524	57.0757	0.0972026	0.0927123	12.9683
	SD			2.40209	0.729094	20.5955		0.120632	64.5411	22.9446		17.8312			0.146304	0.288546	0.0190121	0.0965789	0.00750807	14.33	42.5734	0.566374	0.245609	0.0177558	0.77241	2.18073	1.05238	0.00897152	0.00986789	0.196782
	Titania-2-10	Smooth	Rutile	87.7902	223.926	650.986	b.d.l.	47.8837	1941.74	1352.89	b.d.l.	1434	b.d.l.	b.d.l.	1.27807	4.30236	0.525895	b.d.l.	0.170089	699.43	1538.29	2.15065	48.9047	0.150676	31.2696	127.187	388.455	0.0832674	0.285998	39.7558
	SD			2.14669	4.04433	23.8229		0.926263	37.5166	27.4888		30.0188			0.175914	0.421098	0.0318328		0.0152016	18.0056	33.4042	0.110009	0.627754	0.020973	0.723397	2.70673	7.50116	0.0232065	0.0231181	0.939373
	Titania-2-12	Porous	Anatase	250.708	5610.46	1344.89	804.901	8.9545	624.577	391.028	35.2714	8840.71	0.151062	0.680715	2.40455	253.062	9.33608	3.64597	35.1987	3129.78	1691.85	44.7888	64.4835	7.48628	44.5669	185.687	356.562	423.434	32.1221	2971.69
	SD			5.99469	140.875	31.4569	14.502	0.277899	13.9888	8.83503	0.761718	191.531	0.014755	0.095635	0.220081	5.12803	0.188162	0.150174	0.805945	81.325	42.0684	1.07591	0.903925	0.122549	1.19317	4.97219	7.51956	5.65077	0.668293	50.0853
	Titania-2-13	Smooth	Rutile	86.07	98.0355	607.316	b.d.l.	2.01371	1007.73	107.283	b.d.l.	5639.82	0.0895041	b.d.l.	1.03257	6.56553	0.320337	b.d.l.	0.0247584	302.928	1107.36	2.89369	82.191	22.8456	16.6507	104.368	396.993	0.0492331	0.0172534	27.2482
	SD			2.35172	2.21396	22.1026		0.0787451	19.6822	2.38085		148.132	0.0142309		0.0842506	0.704894	0.0285725		0.0046031	6.69746	20.2171	0.119534	1.13041	0.301236	0.394134	1.85798	7.94561	0.0114217	0.00198817	0.692805
	Titania-2-14	Smooth	Anatase	88.3468	143.383	679.641	b.d.l.	286.349	978.291	6.0126	1.20062	968.636	b.d.l.	b.d.l.	1.11509	5.24854	0.0665136	b.d.l.	0.261572	1942.89	347.446	0.0489721	47.1785	0.398927	43.4508	15.7373	33.7977	1.13356	0.0551041	0.848375
	SD			2.8948	4.34678	26.2257		10.3626	23.451	0.364462	0.101923	34.1417			0.106522	0.762409	0.0140993		0.0150858	43.2631	7.4082	0.0184518	1.0131	0.027722	0.80927	0.401478	2.05214	0.0320063	0.00581587	0.308844
	Titania-2-15	Smooth	Rutile	86.3678	289.938	604.594	b.d.l.	2.35929	3344.36	1336.97	b.d.l.	1418.54	b.d.l.	b.d.l.	1.50206	5.84061	0.662522	b.d.l.	0.0301449	2495.39	1297.46	7.10778	17.7951	b.d.l.	108.143	45.6465	5.24695	b.d.l.	b.d.l.	24.3312
	SD			2.57346	6.93099	25.8141		0.0876156	78.3364	31.2994		29.0079			0.214917	0.908031	0.0403891		0.00622044	56.2322	30.581	0.242527	0.312444		2.66824	1.11565	0.141963			0.518731
	Titania-2-16	Smooth	Anatase	89.5919	102.942	1444.93	317.806	138.983	75.3687	0.882325	138.88	3583.16	b.d.l.	b.d.l.	1.19917	13.9944	0.417188	4.63001	10.2245	102.47	9288.93	0.0621499	48.858	7.10938	7.73752	602.8	22.7092	87.2812	0.476898	0.616571
	SD			2.70671	2.44804	32.9899	8.96816	4.36647	1.21249	0.178565	4.09504	78.9819			0.171343	0.730895	0.0306993	0.200192	0.176315	4.35221	376.088	0.0172869	0.950551	0.140889	0.246141	12.5459	1.01532	1.0458	0.0171335	0.015668
	Titania-2-17	Smooth	Rutile	87.4705	42.964	639.616	b.d.l.	4.92658	736.057	1147.05	18.072	4185.11	0.031559	b.d.l.	1.67403	4.01666	0.0421663	b.d.l.	0.188498	291.251	573.466	15.1789	13.1718	16.1589	11.8084	20.8792	394.71	0.200574	0.426558	38.8341
	SD			2.2531	4.17938	24.0872		0.105888	15.6105	21.0853	1.30031	84.5784	0.00919582		0.236951	0.397659	0.0117987		0.0161026	4.8141	12.6355	0.35393	0.187078	0.243919	0.20271	0.643234	13.6234	0.0125966	0.0303382	0.582299
	Titania-2-18	Smooth	Rutile	85.7899	113.894	591.663	b.d.l.	79.5561	3363.98	1003.98	1.63893	2118.59	b.d.l.	b.d.l.	1.029	5.22703	0.49456	b.d.l.	0.0275588	617.249	7042.79	1.27916	145.409	0.220626	32.3049	495.547	1451.36	0.086749	0.0772232	2.13026
	SD			3.07019	3.07307	24.9823		2.14975	87.8701	25.1173	0.115356	49.294			0.131814	0.732759	0.0403613		0.00408921	10.8307	193.76	0.0838456	2.13288	0.0235686	0.735567	15.3155	25.0294	0.0125342	0.00450576	0.053997
	Titania-2-19	Smooth	Rutile	85.0121	49.4209	589.931	b.d.l.	158.197	609.249	286.766	0.759996	8934.35	b.d.l.	b.d.l.	1.15946	4.74051	0.348698	0.533328	0.0232113	257.669	1619.44	8.85947	854.079	190.597	21.0703	115.088	1268.28	b.d.l.	0.0330194	66.1249
	SD			2.3718	1.04499	22.482		2.27939	11.1385	5.01799	0.102597	136.145			0.119938	0.678685	0.0317893	0.0989204	0.00379398	4.6597	29.2588	0.336546	11.0109	2.26345	0.452303	1.12744	21.8393		0.0029269	1.32916
	Titania-2-20	Porous	Rutile	221.527	6095.65	1422.4	735.564	7.42147	764.924	386.44	35.7736	9573.9	0.151825	0.667807	2.52115	173.343	10.2528	4.00055	27.6376	4326.43	1779.52	45.5323	72.9371	10.091	63.4362	166.824	425.978	458.036	20.9475	1184.74
	SD			5.46666	146.442	32.0576	17.3713	0.20685	16.2321	8.25765	0.629384	173.22	0.0168484	0.10791	0.271273	2.54782	0.179523	0.150582	0.685616	101.762	37.8986	0.973423	0.845104	0.137472	1.52994	4.10954	7.93079	4.95265	0.432533	17.4823
	Titania-2-22	Smooth	Rutile	89.2862	31.0065	757.529	b.d.l.	2.30744	593.005	286.281	0.954697	5845.11	b.d.l.	b.d.l.	1.5848	4.86127	0.191715	b.d.l.	0.151071	357.325	157.728	22.9261	15.6596	2.47264	8.19139	7.81121	2.37814	0.586663	0.362592	14.2118
	SD			2.70727	2.88206	27.1721		0.0937047	14.3455	6.54365	0.325427	156.7			0.17639	0.440117	0.0259233		0.0119135	11.3949	5.64382	0.626642	0.293014	0.0680218	0.329867	0.261692	0.100867	0.0507556	0.0237351	0.255062
	Titania-2-23	Smooth	Anatase	85.6894	9.44546	599.33	b.d.l.	309.503	28.504	1.75889	3.86078	5515.76	b.d.l.	b.d.l.	1.29949	4.05486	b.d.l.	b.d.l.	0.123911	15.5071	8897.32	0.741551	322.188	0.307396	1.33529	1838.15	229.928	0.960839	0.0277942	0.486172
	SD			3.26206	0.951586	26.881		6.75614	0.570401	0.225596	0.288481	84.6618			0.115545	0.375858			0.0721695	0.397183	199.358	0.0646344	5.6381	0.0363911	0.0405167	28.8039	2.9874	0.0602011	0.00269976	0.0209494
	Titania-2-24	Porous	Anatase	200.933	5081.24	1233.08	892.671	10.4036	632.158	411.844	42.2653	7968.76	0.0543751	0.464021	2.20363	44.6096	7.69839	3.99961	40.7345	3909.45	1749.48	44.0047	58.234	5.97241	56.2749	159.681	384.511	375.248	23.7883	2245.95
	SD			5.89481	151.237	31.9738	35.9371	0.565203	16.5856	16.5266	1.08897	269.885	0.0112034	0.0913458	0.245991	1.66255	0.250673	0.180287	1.77289	81.7192	48.5404	1.29184	1.70401	0.14874	1.15746	5.39714	8.64261	7.24096	0.542261	68.2393
	Titania-2-25	Smooth	Anatase	88.3704	56.9462	1831.98	b.d.l.	254.592	207.046	426.153	11.0583	3984.07	0.0282976	b.d.l.	1.41374	4.73439	0.0885516	b.d.l.	4.80825	1451.72	872.011	0.248282	1202.69	14.9422	75.8862	25.9215	34.075	8.53446	1.29035	4.66324
	SD			3.06594	10.0558	165.846		10.5344	5.74718	12.2892	0.361295	78.3616	0.0130508		0.174654	0.559265	0.0170138		0.153449	36.1687	24.2199	0.0897957	25.7855	0.267779	1.91676	0.653121	0.722147	0.16602	0.0501533	0.333223
	Titania-2-26	Smooth	Anatase	87.5114	50.1483	738.372	36.8388	305.68	75.2746	2.15809	146.265	6696.98	b.d.l.	b.d.l.	1.17924	4.94391	0.161896	0.544389	5.33153	934.57	9601.33	0.335464	43.4255	5.57406	34.2847	84.3499	1674.82	60.1051	1.74755	19.3647
	SD			2.78944	2.33483	30.2619	8.1613	7.34823	1.87161	0.261259	15.5413	106.074			0.128954	0.311988	0.0255968	0.113242	0.159966	36.2635	116.342	0.0428136	0.796986	0.382013	1.2366	4.19357	178.194	2.95163	0.0391664	0.976459
	Titania-2-28	Smooth	Rutile	88.9437	75.5708	678.374	39.1321	21.8671	2546.55	309.667	b.d.l.	1274.97	b.d.l.	b.d.l.	1.34755	3.49071	0.18424	b.d.l.	0.131744	606.783	1823.74	2.38724	64.5635	0.688082	19.4853	69.3627	298.252	0.161275	0.0650791	11.457
	SD			2.79889	1.75537	28.6117	9.14107	0.688787	76.5068	9.10216		32.3594			0.154072	0.324763	0.0207743		0.0115581	17.5222	53.403	0.136425	1.08733	0.0467168	0.584108	2.02589	8.32645	0.0178037	0.00461942	0.229164
	Titania-2-29	Smooth	Rutile	88.7392	20.8531	683.269	b.d.l.	2.56152	2079.92	28.412	b.d.l.	1798.69	b.d.l.	b.d.l.	1.18017	4.88986	0.0778811	1.29827	0.0255235	694.383	1379.64	22.7522	43.1126	0.173726	24.6292	53.8385	192.412	b.d.l.	b.d.l.	8.75762
	SD			2.47137	0.50929	40.4995		0.0960168	44.4414	0.873465		30.957			0.185699	1.10914	0.013032	0.115257	0.00447712	14.1073	29.475	0.547879	0.563376	0.0248026	0.607149	1.3769	5.22707			0.118519
	Titania-2-30	Porous	Rutile	124.375	298.01	1433.92	386.105	12.8676	2648.4	2046.8	744.258	9287.86	0.223786	1.48672	11.3381	34.9088	4.60391	10.2021	39.7263	700.543	2322.59	41.8328	775.048	479.499	28.8321	101.614	561.9	656.219	60.162	244.316
	SD			4.78068	16.9297	51.9373	30.0184	0.4198	108.782	89.5886	25.2737	320.34	0.0247609	0.194351	0.609262	2.14394	0.177662	0.332267	1.41415	18.2369	92.6781	1.68777	20.6668	13.0417	1.00121	3.44485	22.7874	15.3429	2.22158	10.1362
	Titania-2-31	Smooth	Rutile	83.0093	72.0375	736.074	b.d.l.	303.326	5115.63	6541.03	b.d.l.	1446.25	b.d.l.	b.d.l.	1.15035	3.39964	0.269053	0.906617	0.0289911	1102.71	12375.3	28.8008	164.359	0.187539	56.2436	856.337	3264.88	0.21135	b.d.l.	86.9361
	SD			2.39024	1.29803	24.1463		7.01582	120.722	138.805		32.4853			0.192352	0.46768	0.0268689	0.0915321	0.0038715	24.897	263.113	0.705923	2.41124	0.022733	1.3319	20.5438	75.3911	0.213392		2.34525
	Titania-2-32	Porous	Anatase	253.077	5529.6	3105.33	911.111	8.95974	515.454	411.153	39.6564	8154.08	0.201738	0.492581	3.43354	179.438	8.53202	3.59691	48.5765	2704.58	1407.68	35.7533	61.7903	8.87225	38.0813	158.014	279.636	342.358	31.6389	2903.6
	SD			8.42927	197.56	126.218	20.2834	0.29163	15.9785	10.8068	0.886738	230.604	0.0191724	0.0867976	0.211006	2.94472	0.250699	0.181842	1.30247	78.055	42.5301	0.968282	1.10755	0.168262	1.12615	4.49728	7.01479	4.4554	0.726913	58.0195
The upper Yaojia Formation	Titania-3-01	Smooth	Anatase	94.819	218.018	2372.29	1964.46	375.386	125.26	16.0309	47.8361	5097.18	b.d.l.	b.d.l.	1.22395	4.8903	1.46078	1.32826	74.985	1614.53	4861.79	1.37818	209.889	2.66623	137.665	753.641	2096.08	91.7199	29.8332	20.1487
	SD			3.17035	6.8885	113.875	134.426	14.2553	4.75099	0.582288	1.52607	183.878			0.25967	0.41508	0.111015	0.1685	4.95711	56.0743	154.675	0.111008	8.38646	0.080824	5.04984	21.9663	87.9792	1.56165	0.943287	0.796152
	Titania-3-02	Smooth	Anatase	88.732	298.575	922.545	b.d.l.	19.2957	69.3731	3.40004	b.d.l.	6809.26	b.d.l.	b.d.l.	1.13971	5.5796	0.107512	0.907792	0.473386	674.724	950.04	0.485154	3.42491	0.284525	21.6349	27.5642	147.701	38.1347	0.20378	9.17763
	SD			3.05745	5.90554	26.6667		0.504393	1.54117	0.31634		137.72			0.107562	0.418006	0.0239966	0.129858	0.0222553	18.2106	34.301	0.0525947	0.106913	0.0330242	0.640057	0.920722	3.09427	1.35807	0.0109464	0.29665
	Titania-3-03	Smooth	Anatase	98.5679	364.957	1753.92	341.66	759.021	94.2851	b.d.l.	83.2244	3963.3	b.d.l.	b.d.l.	2.02574	8.3384	0.583122	2.40768	80.8999	1483.36	3299.07	1.1592	30.47	4.34769	97.1801	313.689	337.693	7.7058	10.5295	0.485334
	SD			4.24726	14.3521	39.4399	10.2025	32.2561	1.95271		11.8059	89.6058			0.223698	0.970098	0.0430356	0.161592	1.18749	39.871	85.7075	0.0911499	0.725662	0.114128	2.99447	9.95097	5.43717	0.123233	0.164775	0.0131218
	Titania-3-04	Smooth	Anatase	92.3362	61.6534	842.961	b.d.l.	46.9863	510.367	19.7928	1.63376	8292.64	b.d.l.	b.d.l.	1.625	5.22408	0.0490846	b.d.l.	0.326187	153.572	5859.27	2.67633	754.839	3.17925	13.0882	372.914	4855.04	6.65339	0.608714	5.7486
	SD			4.57404	10.5312	28.2528		0.729801	17.187	1.24667	0.118203	197.623			0.3147	0.894524	0.0149228		0.0184641	4.24721	163.887	0.142821	27.542	0.187496	0.400549	14.4925	63.346	0.218043	0.0158177	0.127845
	Titania-3-05	Smooth	Rutile	90.8075	791.433	1612.26	63.9163	7.09423	38.7531	64.9241	81.7872	12726.8	0.137396	0.524108	1.38009	5.30951	1.82325	0.690778	11.6128	11.2575	1543.07	b.d.l.	6087.77	20.7011	0.478238	112.733	3430.64	4.63547	3.52418	0.787965
	SD			2.09856	11.448	108.796	6.93316	0.211617	4.06804	2.14799	3.7431	379.717	0.0160985	0.113635	0.0969597	0.379951	0.0738476	0.106401	0.469849	1.04103	57.6351		91.1117	0.471789	0.0305641	4.23442	100.039	0.348183	0.232465	0.234608
	Titania-3-06	Smooth	Anatase	85.2005	108.942	814.712	b.d.l.	176.327	230.711	3.09733	26.7683	6960.75	0.0473643	b.d.l.	1.31899	6.08038	0.221911	b.d.l.	7.27017	182.459	4942.74	2.43099	89.0198	0.960359	11.4196	457.4	3279.89	13.5791	0.956869	0.678429
	SD			2.40292	3.66595	33.065		4.93336	6.89351	0.344612	2.02984	130.604	0.0120305		0.147894	0.562244	0.0283329		0.454773	3.07003	60.8069	0.218427	1.09507	0.0648927	0.205706	11.4942	106.531	0.76608	0.071441	0.0411882
	Titania-3-07	Smooth	Anatase	97.4587	544.477	2215.04	537.022	562.47	523.619	2.4505	280.936	9867.13	b.d.l.	b.d.l.	1.92491	18.281	1.50259	1.92882	8.45003	1656.17	11542	2.2674	450.992	1.26746	108.046	1623.72	514.134	288.439	0.542339	32.934
	SD			2.76199	15.8696	62.4198	17.9817	12.9783	10.9498	0.293529	8.52676	226.927			0.335363	0.978055	0.063548	0.120383	0.169595	41.5519	328.529	0.116896	6.03522	0.0627736	2.55796	50.3092	8.75321	5.74294	0.016562	0.601888
	Titania-3-08	Smooth	Rutile	86.9566	201.169	623.103	b.d.l.	69.3338	1326.04	1002.86	0.795145	2400.87	b.d.l.	b.d.l.	1.20669	4.14653	0.471153	1.0568	0.0343204	138.249	2242.48	0.34335	200.543	0.523169	12.8981	153.186	154.817	b.d.l.	b.d.l.	0.609144
	SD			2.85411	7.92953	26.8218		1.56363	34.169	22.0437	0.136623	55.9016			0.135005	0.399505	0.0382632	0.12915	0.00571926	3.08185	58.2136	0.039724	2.96111	0.0377123	0.319481	3.65255	3.84293			0.0199268
	Titania-3-09	Smooth	Anatase	84.9983	77.3452	643.901	b.d.l.	294.553	376.916	14.9423	4.14462	5334.65	b.d.l.	b.d.l.	1.05761	2.93985	0.140956	b.d.l.	0.105509	2269.84	267.03	11.0889	27.8852	2.27399	47.9162	18.4674	66.0429	8.20663	b.d.l.	0.360747
	SD			2.97026	2.94177	33.1181		4.58031	8.35416	0.520227	0.364563	93.9612			0.104739	0.346311	0.0282151		0.0112444	52.5903	4.73332	0.322383	0.412616	0.101388	1.27993	0.580894	1.40351	0.811233		0.0123706
	Titania-3-10	Smooth	Anatase	463.189	7637.1	11980.6	1023.38	427.799	277.353	17.5365	32.765	8047.69	0.146726	b.d.l.	1.26711	12.1172	4.28855	1.31513	39.8607	1671.56	2557.63	4.73436	91.3238	2.47217	52.3395	157.704	571.721	58.2184	7.71736	11.5937
	SD			33.5782	717.388	1028.29	92.5104	15.2552	2.88201	0.691719	1.2296	104.323	0.0205767		0.13318	0.761653	0.376154	0.165291	1.99155	52.3549	125.003	0.26344	1.56255	0.181327	2.00998	6.36097	20.7299	1.38486	0.50097	0.169458
	Titania-3-11	Porous	Anatase	297.256	1247.61	7302.71	1208.86	29.2026	86.3984	12.2889	141.063	2262.67	0.0614681	b.d.l.	3.99068	21.8074	1.4453	2.07048	175.406	2865.87	3482.55	26.8618	4.00391	5.20661	63.1646	99.2219	213.746	682.898	44.0146	153.783
	SD			10.3289	31.014	244.893	40.4249	1.26175	3.04375	0.653157	5.29153	76.8885	0.0112169		0.309712	1.03108	0.0818697	0.165451	8.38993	130.214	124.365	0.91703	0.196919	0.175435	2.94214	3.75544	6.89655	15.7035	1.83974	5.82484
	Titania-3-12	Smooth	Anatase	249.581	1567.77	4607.33	1106.84	517.87	237.365	7.66604	91.0774	2912.34	0.080228	b.d.l.	1.66736	13.3978	0.880265	0.693112	17.7552	1913.77	1024.93	15.4024	48.7318	2.90138	44.4897	75.5179	22.218	326.111	8.94804	2.96513
	SD			9.45563	67.7424	159.738	67.1099	16.5553	7.09613	0.882198	7.4381	184.611	0.0166845		0.174785	0.850753	0.0710843	0.119616	0.369765	48.4864	36.804	0.629015	1.38294	0.195148	1.37718	2.1497	1.23468	4.09627	1.16072	0.129707
	Titania-3-13	Smooth	Rutile	85.2302	133.965	587.452	b.d.l.	3.65905	2331.46	764.673	b.d.l.	1566.44	b.d.l.	b.d.l.	1.86578	5.83188	0.467399	b.d.l.	0.0545944	3251.28	5119.54	76.8955	21.222	b.d.l.	144.873	301.998	23.1835	0.0427618	0.0343971	15.2742
	SD			2.908	4.39607	27.9239		0.141837	68.7822	21.533		42.9262			0.256917	1.07589	0.0442932		0.00963575	96.371	146.952	2.56936	0.433006		4.43632	9.15065	0.668118	0.0179544	0.00771729	0.461398
	Titania-3-14	Smooth	Anatase	93.3215	531.041	1631.69	222.653	73.6005	6.42943	b.d.l.	6.26547	8790.16	b.d.l.	b.d.l.	0.974659	3.31058	0.392006	b.d.l.	7.22004	590.372	18375	0.0575227	24.1419	0.271768	29.9591	883.781	346.555	5.42486	0.826904	1.26759
	SD			2.99063	48.937	180.674	25.2735	1.86947	0.190717		0.205108	221.112			0.125682	0.344497	0.053846		0.484766	9.09252	526.143	0.0189272	0.560372	0.0308564	0.604583	32.4796	11.0233	0.16818	0.0191085	0.029987
	Titania-3-15	Porous	Anatase	195.907	1476.41	4732.21	1707.14	28.3459	1459.05	476.959	127.627	10633.4	0.0879254	0.960076	2.28279	98.6526	7.75772	9.07044	34.6151	2892.27	3580.61	164.818	4.70623	34.1884	31.3682	153.802	628.6	1335.54	16.8687	109.698
	SD			5.41604	39.3442	104.894	41.2489	0.821047	37.5725	11.1839	3.11897	256.671	0.0120948	0.117106	0.172977	1.72087	0.180975	0.232408	0.961206	76.7467	86.1399	3.96824	0.13478	0.469352	0.895631	4.32975	14.2526	20.7611	0.520473	2.80562
	Titania-3-16	Smooth	Anatase	134.449	536.674	2158.99	1403.58	170.724	101.885	3.60245	10.1117	1424.98	0.0441986	b.d.l.	1.75609	6.86275	0.318819	b.d.l.	15.4302	695.57	2494.81	0.0976435	2.26593	3.69898	26.2769	108.418	1781.12	5.24057	19.2133	5.08802
	SD			6.71509	17.2899	66.2974	87.2188	4.53431	3.16394	0.318347	0.375558	61.0916	0.0137695		0.533401	0.686583	0.0350987		0.454408	24.6298	88.2181	0.0444863	0.147582	0.0963511	0.981785	2.86605	47.9058	0.204593	0.491706	0.149095
	Titania-3-17	Smooth	Anatase	175.571	3396.8	4303.19	1109.49	100.389	414.224	7.65305	72.4947	10873.6	0.432334	b.d.l.	1.61524	17.4311	6.30719	0.961676	15.171	1188.64	2058.81	4.38575	22.334	24.7597	28.2665	76.953	18891.5	405.021	1.60578	20.939
	SD			13.5691	353.323	374.004	117.064	2.78193	13.3262	1.07428	8.35619	382.652	0.0711443		0.243137	1.53039	0.514091	0.181053	1.30332	83.9549	33.7206	0.179562	0.587603	2.06283	1.61531	2.81885	586.848	45.7063	0.1216	1.82857
	Titania-3-18	Porous	Anatase	182.578	1704.13	5068.14	1071	109.089	311.441	93.9621	74.5751	10398.3	0.156299	0.561558	2.77413	216.067	9.70207	15.0769	46.6186	948.463	8912.2	262.114	36.6564	84.6693	24.5117	369.782	2715.11	768.604	9.07784	137.734
	SD			4.30796	49.9064	122.46	20.8636	3.23103	8.05887	2.30142	1.10618	191.04	0.020413	0.125557	0.306808	2.50603	0.188078	0.359729	1.26968	23.8597	255.97	6.59135	0.521326	1.05441	0.660456	11.102	67.8902	9.40746	0.237463	3.7573
	Titania-3-19	Smooth	Rutile	87.3305	56.5468	755.083	b.d.l.	41.0577	2209.69	283.447	5.91041	2806.85	b.d.l.	b.d.l.	0.724925	4.55498	0.16392	0.504744	0.101869	555.131	2453.13	7.98976	215.262	7.05595	28.9006	183.727	1322.08	0.405494	b.d.l.	82.3062
	SD			1.99819	3.99708	53.8715		0.640023	31.0908	4.7231	0.457869	45.6804			0.081683	0.898613	0.0224426	0.114576	0.00794973	8.29101	39.5501	0.209074	1.84106	0.142175	0.441516	2.91603	14.9302	0.084957		1.76574
	Titania-3-20	Smooth	Anatase	95.4125	336.498	1095.71	180.139	166.748	42.7127	b.d.l.	75.0439	3012.51	b.d.l.	b.d.l.	1.02699	4.08097	0.28481	0.475919	22.8054	1099.18	2295.09	0.0348334	9.31599	1.73591	35.862	132.704	4350.62	18.7481	4.32482	17.6594
	SD			3.30917	5.45921	33.6547	12.6327	5.5719	1.14898		3.80771	51.6947			0.178932	0.287201	0.033874	0.143304	1.25482	18.2947	62.5604	0.0137385	0.343807	0.0790094	0.784286	2.38451	70.0116	0.954773	0.32264	0.272143
	Titania-3-21	Smooth	Anatase	93.3746	1642.64	3989.06	1652.8	615.048	496.768	120.178	296.17	761.878	b.d.l.	b.d.l.	1.84159	8.10879	2.24789	0.650951	147.243	28.7728	1099.52	0.10805	51.5565	2.09279	4.07306	64.0655	2052.69	2.44286	11.6359	33.326
	SD			3.05832	48.9051	108.07	54.4895	16.8388	14.971	2.25639	9.67592	23.4811			0.222561	0.794067	0.0877395	0.11989	5.08686	0.381399	25.5693	0.0379665	0.978226	0.0898856	0.116177	2.34774	61.826	0.0524311	0.376959	1.06158
	Titania-3-22	Smooth	Anatase	165.614	243.041	2046.16	341.017	131.681	1424.47	17.49	74.1716	6114.99	0.0968923	0.555496	1.24692	10.0634	2.3559	1.87135	97.7784	1528.04	2760.08	2.82854	214.804	5.60502	157.253	393.266	13.3523	10.0316	20.315	13.4578
	SD			10.876	13.3482	91.5433	20.0772	2.35841	52.701	0.715161	4.95974	170.899	0.0186031	0.112066	0.142629	0.832797	0.170377	0.153269	5.93973	31.8907	59.3154	0.166572	3.16366	0.288228	2.60117	11.1031	0.292505	0.55971	1.02991	0.541638
	Titania-3-23	Smooth	Anatase	90.6651	171.611	1078.09	256.306	71.7748	310.849	16.9201	20.0265	3672.49	b.d.l.	b.d.l.	0.635961	6.46546	0.331418	0.661082	10.9727	1659.71	3490.36	3.97622	148.637	20.1797	119.948	321.029	9.24835	34.2352	4.65512	2.94978
	SD			2.98784	5.08538	27.8604	24.166	2.55435	6.69717	0.792456	0.312546	111.039			0.102338	0.586461	0.031886	0.120453	0.864351	49.6734	103.723	0.18092	2.13453	1.22024	3.73096	5.31608	0.255445	2.61064	0.372638	0.0570304
	Titania-3-24	Smooth	Rutile	88.4499	81.1762	880.932	b.d.l.	26.305	1123.36	730.455	1.32003	1636.46	b.d.l.	b.d.l.	1.65141	3.99618	0.175878	0.716371	0.257356	128.833	2751.19	5.81756	141.384	2.80656	7.40415	192.343	421.585	0.475561	2.33121	10.0179
	SD			2.55052	2.15514	73.563		0.575529	23.3513	13.6575	0.129791	28.2661			0.243614	0.499344	0.0222469	0.101403	0.016213	2.96594	57.9665	0.184725	1.66944	0.0744872	0.165222	4.31189	10.2568	0.0194456	0.0488298	0.154067
Detection limit				0.204765	0.342161	95.7505	35.6137	0.0671232	0.0290546	0.770664	0.528022	4.60757	0.0272279	0.438448	0.1382	0.146845	0.01	0.418339	0.01	0.01	0.01	0.01	0.111915	0.0383442	0.01	0.01	0.01	0.01	0.01	0.01

## Sheet: Titanium isotope
Table S3 Titanium isotope for titania from the Hailijin Ore field
Hosted rock	Sample No.	δ49/47Ti（‰）	2SE
The lower Yaojia Formation	Titania-2-1	-0.343	0.08
	Titania-2-2	0.347	0.09
	Titania-2-3	0.627	0.1
	Titania-2-4	0.447	0.06
	Titania-2-5	0.477	0.07
	Titania-2-6	0.457	0.09
	Titania-2-7	1.417	0.07
	Titania-2-8	0.617	0.08
	Titania-2-9	0.337	0.08
	Titania-2-10	0.007	0.08
	Titania-2-11	0.677	0.07
	Titania-2-12	1.227	0.09
	Titania-2-13	-0.163	0.07
	Titania-2-14	-0.393	0.08
	Titania-2-15	0.207	0.07
	Titania-2-16	1.327	0.07
	Titania-2-17	-0.313	0.09
	Titania-2-18	-0.173	0.08
	Titania-2-19	1.327	0.08
	Titania-2-20	1.337	0.09
	Titania-2-21	0.137	0.07
	Titania-2-22	-0.453	0.06
	Titania-2-23	0.287	0.07
	Titania-2-24	1.337	0.08
	Titania-2-25	0.217	0.09
	Titania-2-26	0.257	0.08
	Titania-2-27	0.827	0.08
	Titania-2-28	-0.123	0.07
	Titania-2-29	0.187	0.09
	Titania-2-30	0.347	0.08
	Titania-2-31	0.267	0.07
	Titania-2-32	1.277	0.09
The upper Yaojia Formation	Titania-3-1	0.007	0.06
	Titania-3-2	0.917	0.08
	Titania-3-3	0.907	0.06
	Titania-3-4	0.397	0.07
	Titania-3-5	0.357	0.08
	Titania-3-6	-0.143	0.07
	Titania-3-7	0.397	0.08
	Titania-3-8	-0.113	0.07
	Titania-3-9	0.087	0.07
	Titania-3-11	0.687	0.08
	Titania-3-12	0.517	0.07
	Titania-3-13	-0.023	0.08
	Titania-3-14	1.227	0.08
	Titania-3-15	0.067	0.07
	Titania-3-17	0.167	0.07
	Titania-3-19	-0.253	0.1
	Titania-3-20	0.837	0.09
	Titania-3-21	0.007	0.07
	Titania-3-22	0.297	0.09
	Titania-3-23	0.317	0.06
	Titania-3-24	0.067	0.1
